# Supplementary material for: Effects of Cynaroside on Cell Proliferation, Apoptosis, Migration and Invasion though the MET/AKT/mTOR Axis in Gastric Cancer
Source: Int J Mol Sci. 2021 Nov 9;22(22):12125. doi: 10.3390/ijms222212125 (PMC8618935; doi:10.3390/ijms222212125)
Supplement: Supplementary file 1 [file ijms-22-12125-s001.zip › ijms-1405373-supplementary.pdf]

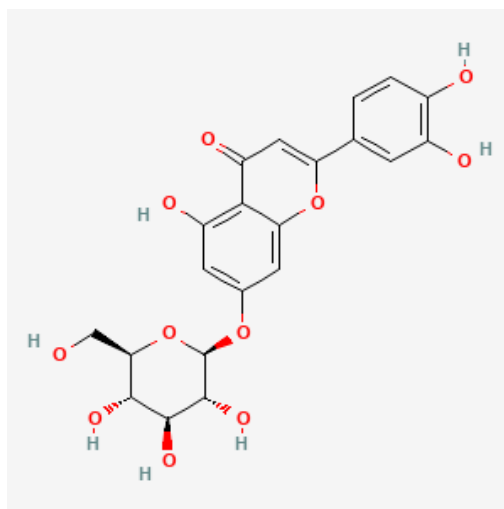

**Figure S1** Structures of Cynaroside (PubChem Compound Database).

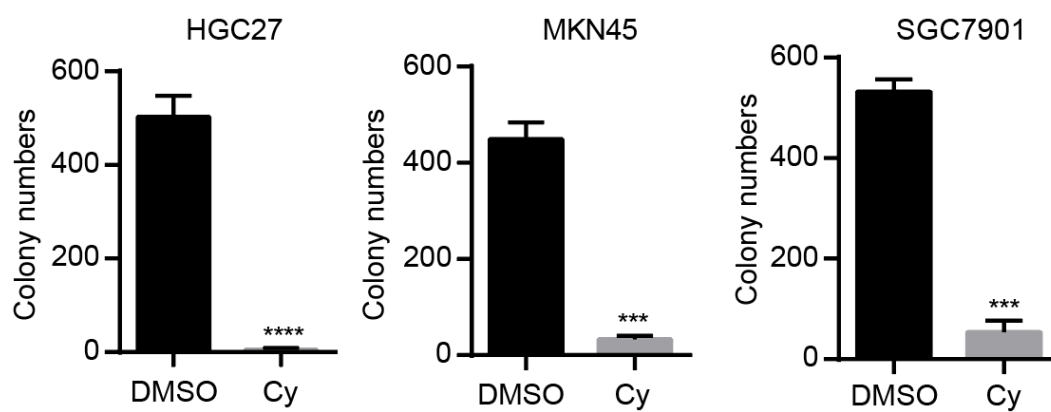

**Figure S2** Quantification of the number of HGC27, MKN45 and SGC7901 cell clones in Figure

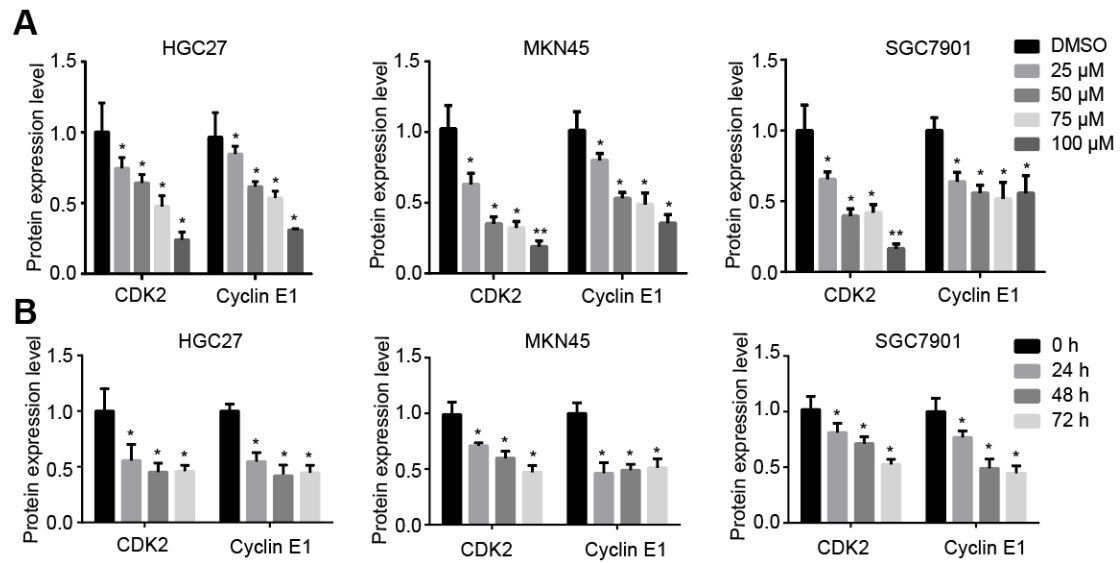

**Figure S3** (A) Quantification of CDK2 and CyclinE2 protein expression of cells treated with different concentrations of Cy for 48 h in Figure 2C; (B) Quantification of CDK2 and CyclinE2 protein expression of cells exposing to 50  $\mu$ M Cy in different time for 0, 24, 48 and 72 h in Figure 2D.

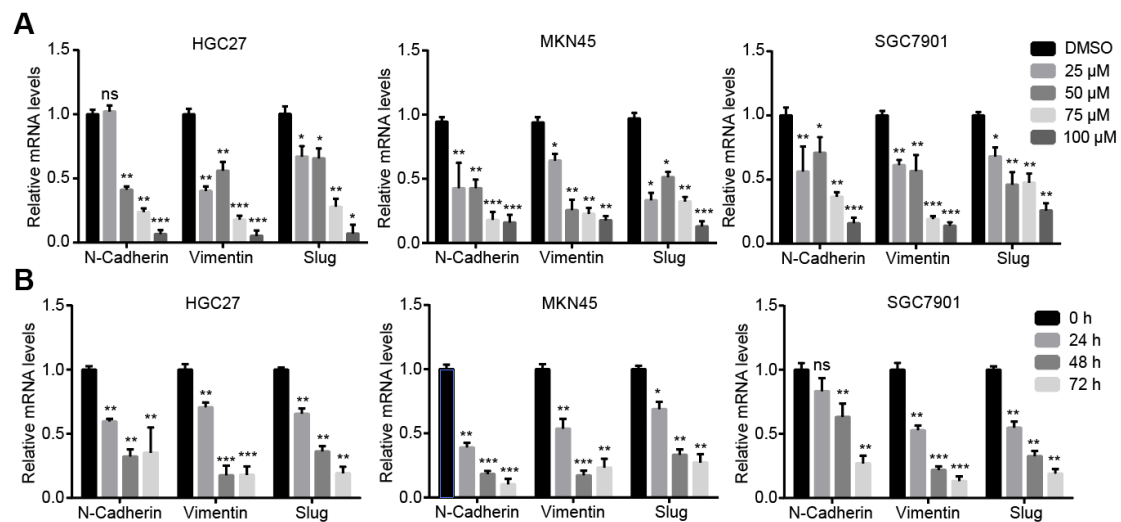

**Figure S4** (A) Quantification of N-Cadherin, Vimentin and Slug protein expression of cells treated with different concentrations of Cy for 48 h in Figure 3E; (B) Quantification of N-Cadherin, Vimentin and Slug protein expression of cells exposing to 50  $\mu$ M Cy in different time for 0, 24, 48 and 72 h in Figure 3F.

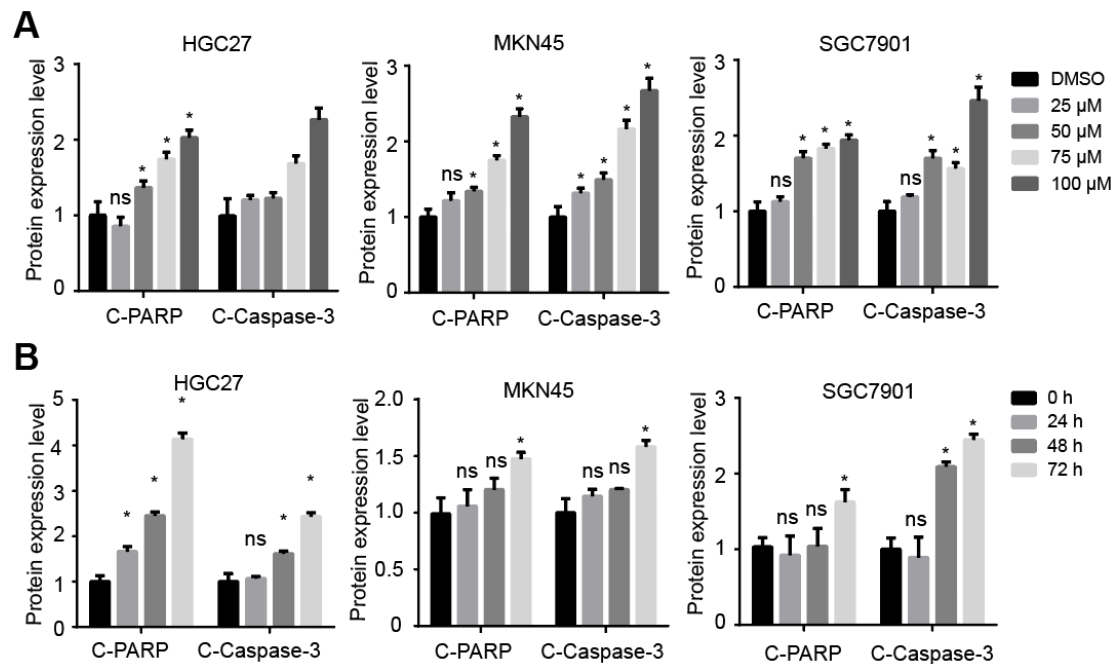

**Figure S5** (A) Quantification of C-PARP and C-Caspase-3 protein expression of cells treated with different concentrations of Cy for 48 h in Figure 4C; (B) Quantification of C-PARP and C-Caspase-3 protein expression of cells exposing to 50  $\mu$ M Cy in different time for 0, 24, 48 and 72 h in Figure 4D.

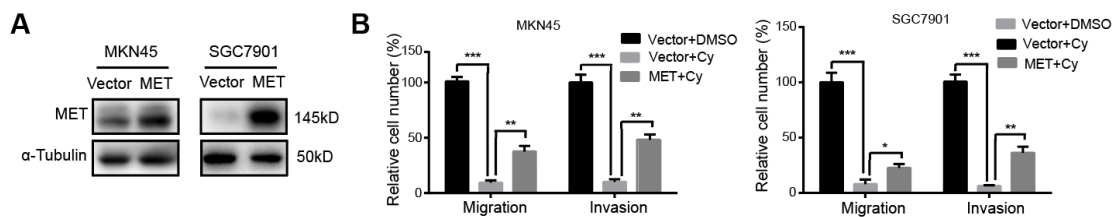

**Figure S6** (A) The expression of MET in MKN45 and SGC7901 overexpressing MET and vector under treatment with Cy (50  $\mu$ M), respectively. DMSO was added as a control. (B) Quantification of migration and invasion in MKN45 and SGC7901 overexpressing MET and vector under treatment with Cy (50  $\mu$ M), respectively. DMSO was added as a control.

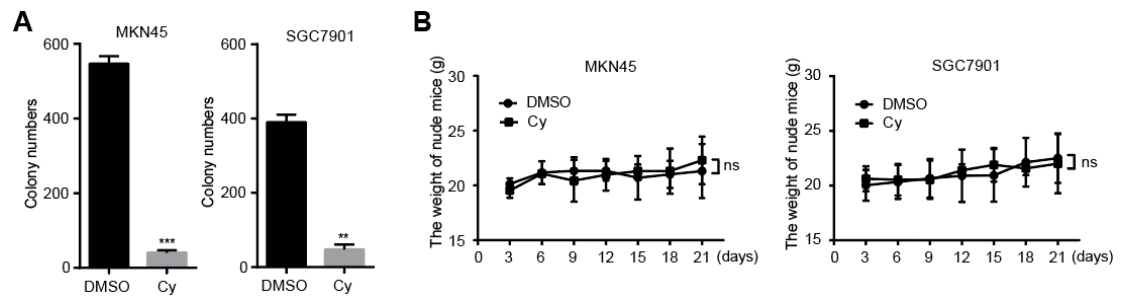

**Figure S7** (A) Quantification of colonies in soft agar test in Figure 6A. (B) The weight of the nude mice.
